# Supplementary material
Source: Copernicus journal article supplement (doi:10.5194/essd-18-4669-2026)
Supplement: Supplementary file 1 [file essd-18-4669-2026-supplement.pdf]

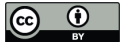

*Supplement of*

## **Extending the late 1963 to 1964 Mt Agung rescued searchlight aerosol profiles dataset at 32° N, from early 1963 to 1975**

**Juan Carlos Antuña-Marrero et al.**

*Correspondence to:* Juan Carlos Antuña-Marrero (jcam45@gmail.com)

The copyright of individual parts of the supplement might differ from the article licence.

**Supplement:**

**Table S1:** Number of individual searchlight aerosol backscattering profiles (ABP) reported to have been measured (Elterman, 1966; 1976; Elterman et al., 1973). The subset of 105 aerosol extinction profiles (AEP) from December 1963 to December 1964 has already been rescued (Antuña-Marrero et al., 2024).

| <b>Period</b>     | <b>No. AEP</b> | <b>Source</b>                  |
|-------------------|----------------|--------------------------------|
| 1963-Feb-Mar      | 3              | Elterman et al., 1973; Table 1 |
| 1963-Dec 1964-Dec | 105            | Elterman, 1966b                |
| 1963-Apr-Jun      | 6              | Elterman et al., 1973; Table 1 |
| 1965-Sep 1966-Jan | 50             | -----//-----                   |
| 1970-Oct-Nov      | 41             | -----//-----                   |
| 1973-Sep          | 34             | Elterman, 1976; Fig. 2         |
| 1973-Dec          | 25             | -----//-----                   |
| 1974-Feb          | 6              | -----//-----                   |
| 1974-Apr          | 18             | -----//-----                   |
| 1974-Jul          | 30             | -----//-----                   |
| 1974-Nov          | 12             | -----//-----                   |
| 1975-Jan          | 10             | -----//-----                   |
| 1975-May          | 19             | -----//-----                   |
| <b>Total</b>      | <b>359</b>     |                                |

**Table S2:** Aerosol turbidity profiles ATP that were not digitized, from L. Elterman, et al., 1973, Figure 2.

| <b>AEP Period</b>        | <b>No. Profiles</b> | <b>Variable</b> | <b>Motive</b>                                                            |
|--------------------------|---------------------|-----------------|--------------------------------------------------------------------------|
| 1964-December-1965-April | 19                  | Turbidity       | Not plotted in figure 2, Elterman et al., 1973                           |
| 1963-July-1964-March     | 40                  | Turbidity       | No observations from Jul-Nov 1963, Elterman et al., 1973. <sup>(*)</sup> |
| 1964-April-November      | 60                  | Turbidity       | Already included in the rescued period Dec-1963 to Dec-1964.             |

(\*) Then the period becomes Dec-1963-Mar-1964, already included in the rescued period Dec-1963 to Dec-1964

10

**Table S3:** Minimum and maximum altitudes of the AEPc. The profiles identified with an asterisk between parenthesis are the digitized AEP.

| <b>Daily Single</b>       | <b>Hmin</b> | <b>Hmax</b> |
|---------------------------|-------------|-------------|
| 1963-03-28                | 6.31        | 25.65       |
| 1963-04-20                | 6.31        | 25.02       |
| 1974-11-11                | 3.28        | 35.28       |
| 1974-11-11 <sup>(*)</sup> | 3.28        | 35.28       |

|                           |       |       |
|---------------------------|-------|-------|
| <b>Monthly mean</b>       |       |       |
| 1974-Nov                  | 10.22 | 24.40 |
| 1975-Jan                  | 10.70 | 24.40 |
| 1975-May                  | 10.70 | 24.40 |
| <b>Bi-Monthly mean</b>    |       |       |
| 1963-Feb-Mar              | 10.70 | 25.02 |
| 1970-Oct-Nov              | 10.70 | 26.94 |
| 1970-Oct-Nov (*)          | 3.28  | 26.29 |
| <b>Multi-Monthly mean</b> |       |       |
| 1963-Apr-Jun              | 10.70 | 24.40 |
| 1965-Sep 1966-Jan         | 10.22 | 26.94 |
| 1973-Sep 1974-Jul         | 10.70 | 24.40 |

15

**References:**

- Elterman, L. An Atlas of Aerosol Attenuation and Extinction Profiles for the Troposphere and Stratosphere; Report AFCRL-66-828, AFCRL: Bedford, MA, USA, 128 p. Available online: <https://apps.dtic.mil/sti/pdfs/AD0649778.pdf> (accessed on 5 June 2024), 1966.
- 20 Elterman, L., Toolin, R. B., Essex, J. D., Stratospheric Aerosol Measurements with Implications for Global Climate, Appl. Opt. 12 (2), 1262-1263, <https://doi.org/10.1364/AO.12.000330>, 1973.
- Elterman, L., Aerosol measurements since 1973 for normal and volcanic stratospheres, Appl. Opt. 15 (5), 1113-1114, <https://doi.org/10.1364/AO.15.001113>, 1976.
